# Supplementary material for: Potent Apoptosis Induction by a Novel Trispecific B7-H3xCD16xTIGIT 2+1 Common Light Chain Natural Killer Cell Engager
Source: MDPI journal article supplement (doi:10.3390/molecules29051140), 2024-03-04
Supplement: s1 [file s1]

Supplementary information

**Potent Apoptosis Induction by a Novel Trispecific B7-H3xCD16xTIGIT 2+1 Common Light Chain  
Natural Killer Cell Engager**

**Michael Ulitzka<sup>1</sup>, Julia Harwardt<sup>1</sup>, Britta Lipinski<sup>1</sup>, Hue Tran<sup>1</sup>, Björn Hock<sup>1</sup>, Harald Kolmar<sup>1,2</sup> \***

1 Institute for Organic Chemistry and Biochemistry, Technical University of  
Darmstadt, Peter-Grünberg-Str. 4, 64287 Darmstadt, Germany

2 Centre of Synthetic Biology, Technical University of Darmstadt

\* Correspondence: harald.kolmar@tu-darmstadt.de

## 1. Screening of anti-B7-H3 Fab

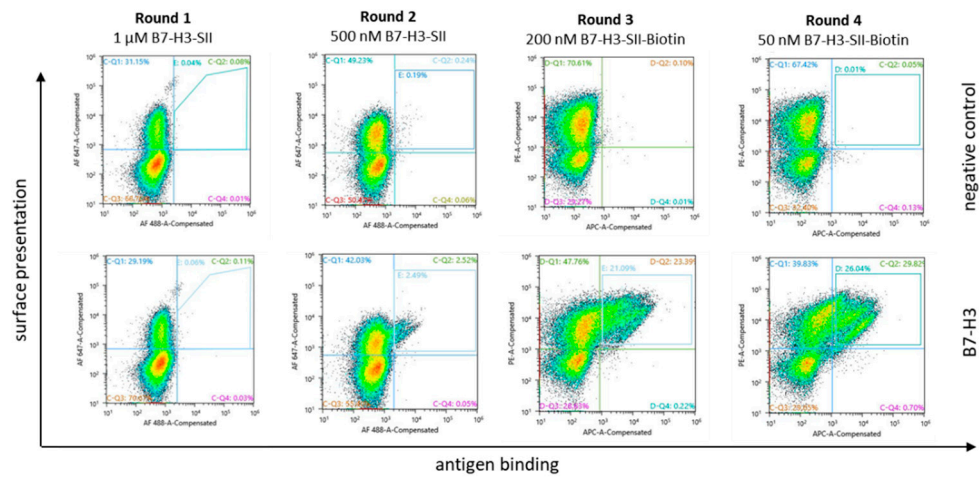

Figure S1. FACS plots of the anti-B7-H3 screening campaign.

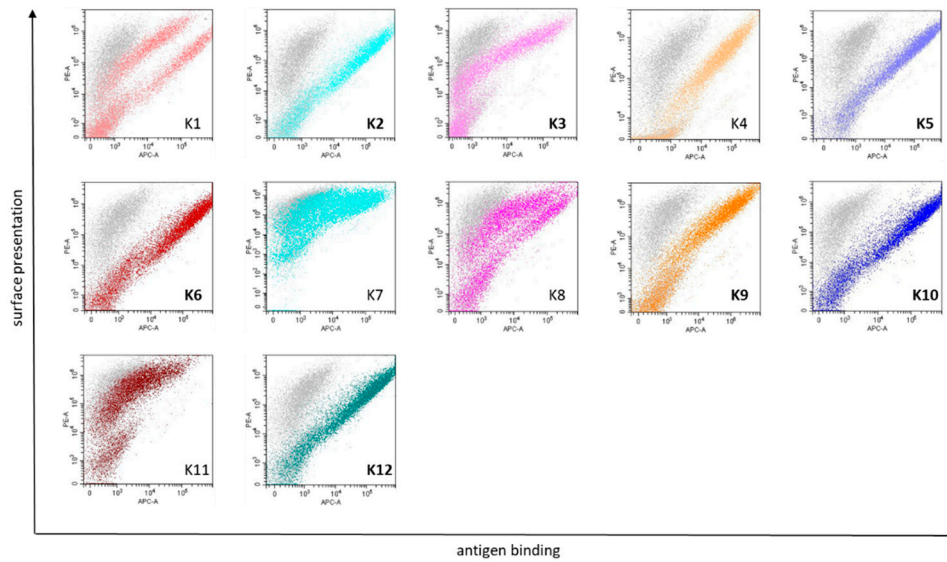

Figure S2. Single clone analysis of anti-B7-H3 Fabs.

## 2. Screening of anti-TIGIT Fab

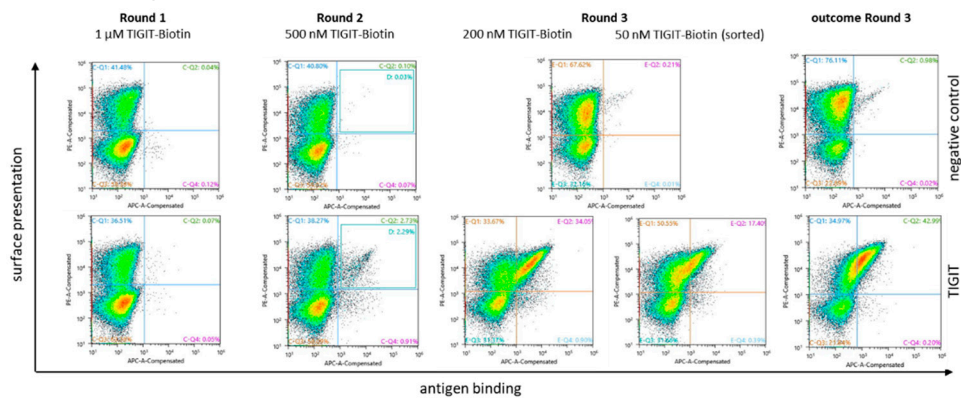

Figure S3. FACS plots of the anti-TIGIT screening campaign.

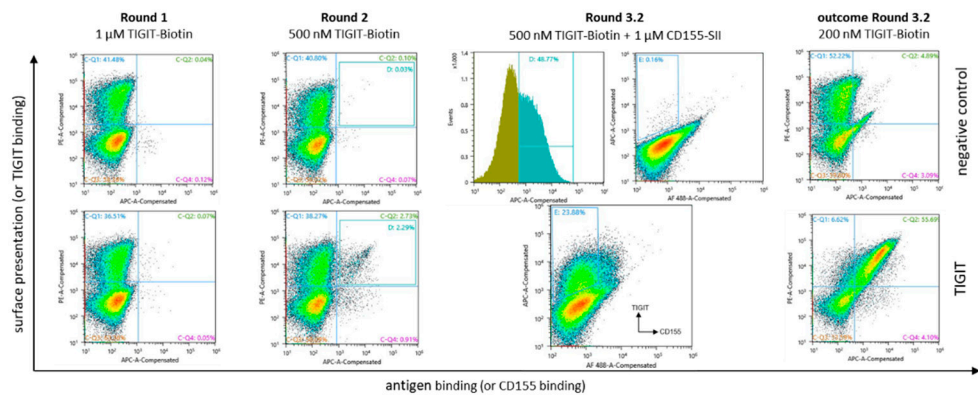

**Figure S4.** FACS plots of the anti-TIGIT screening campaign focusing on blocking antibodies.

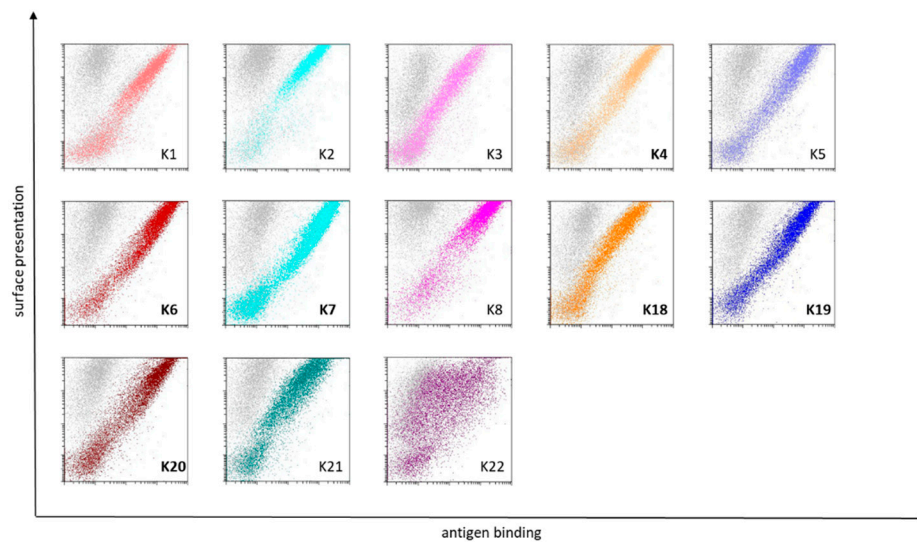

**Figure S5.** Single clone analysis of anti-TIGIT Fabs derived from both screening campaigns.

### 3. Killing assay

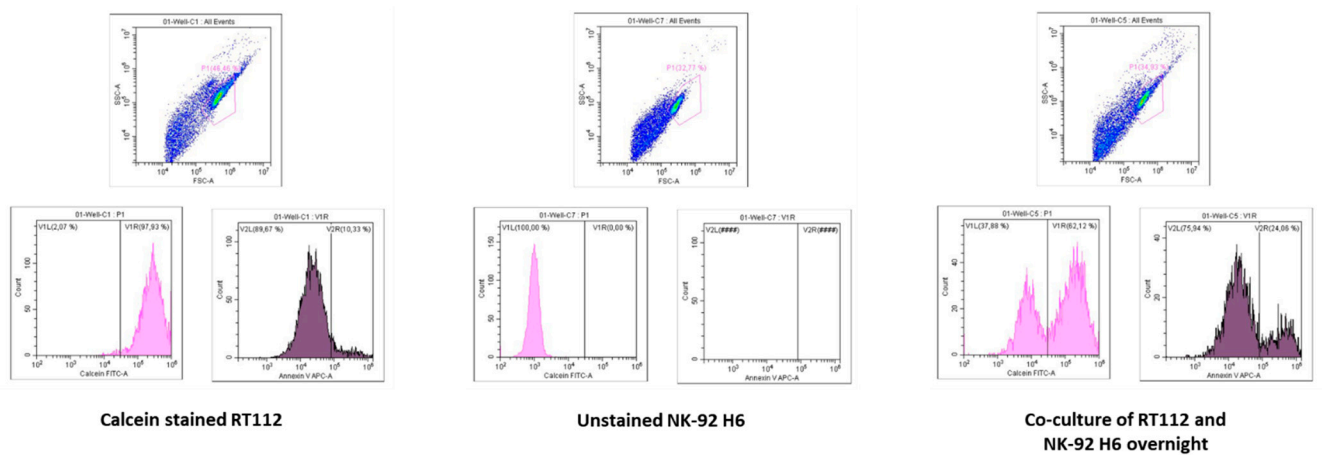

**Figure S6.** Gating strategy used for the analysis of apoptosis induction in the NK-92 H6-based assay.

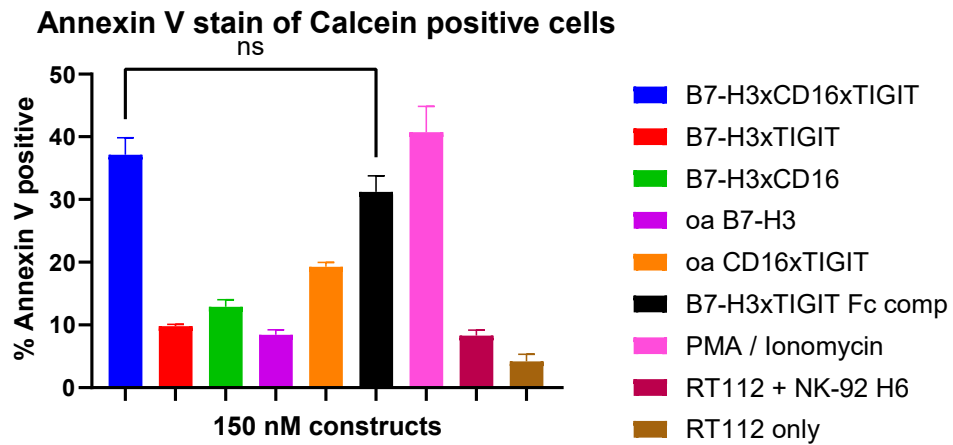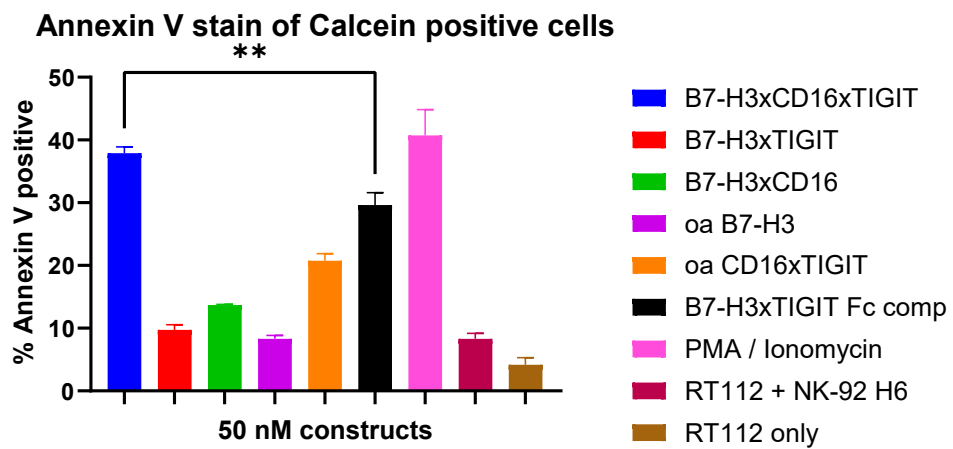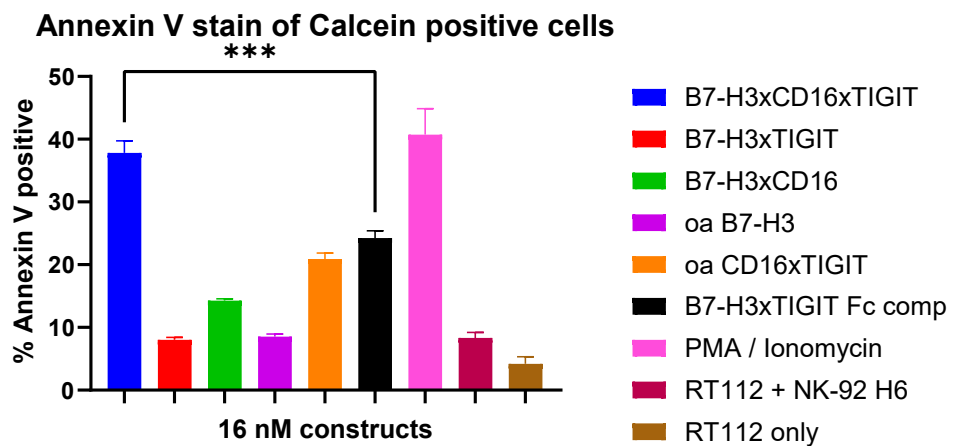

**Figure S7.** Apoptosis induction in RT112 cells by different antibody constructs in the NK-92 H6-based assay.
